# Supplementary material for: Associations of Perfluoroalkyl Substances with Prevalence of Metabolic Syndrome in Highly Exposed Young Adult Community Residents—A Cross-Sectional Study in Veneto Region, Italy
Source: PubMed Central journal article supplement (PMC7908308; doi:10.3390/ijerph18031194), 2021-01-29
Supplement: ijerph-18-01194-s001.pdf [file ijerph-18-01194-s001.pdf]

Table 1. Concentrations of perfluoroalkyl substances (PFAS;  $\mu\text{g/L}$ ) in serum as per defined method detection limit for each compound.

| Type of PFAS(carbon chain length) | Detection limit (LOD) | Quantification limit (LOQ) | Detected participants ( $\geq\text{LOQ}$ ) |       | Mean  | Minimum | 25th  | 50th  | 75th  | Maximum |
|-----------------------------------|-----------------------|----------------------------|--------------------------------------------|-------|-------|---------|-------|-------|-------|---------|
|                                   |                       |                            | Number                                     | (%)   |       |         |       |       |       |         |
| PFBS (C4)                         | 0.1                   | 0.5                        | 199                                        | 1.25  | 0.360 | 0.354   | 0.354 | 0.354 | 0.354 | 5.80    |
| PFPeA (C5)                        | 0.1                   | 0.5                        | 12                                         | 0.08  | 0.354 | 0.354   | 0.354 | 0.354 | 0.354 | 0.60    |
| PFHxS (C6)                        | 0.1                   | 0.5                        | 15,353                                     | 96.72 | 5.972 | 0.354   | 1.60  | 3.60  | 7.90  | 127.0   |
| PFHxA (C6)                        | 0.1                   | 0.5                        | 22                                         | 0.14  | 0.354 | 0.354   | 0.354 | 0.354 | 0.354 | 7.10    |
| PFBA (C6)                         | 0.1                   | 0.5                        | 273                                        | 1.72  | 0.362 | 0.354   | 0.354 | 0.354 | 0.354 | 23.90   |
| PFHpA (C7)                        | 0.1                   | 0.5                        | 99                                         | 0.62  | 0.359 | 0.354   | 0.354 | 0.354 | 0.354 | 15.10   |
| PFOS (C8)                         | 0.1                   | 0.5                        | 15,826                                     | 99.7  | 4.623 | 0.354   | 2.50  | 3.70  | 5.6   | 142.0   |
| PFOA (C8)                         | 0.1                   | 0.5                        | 15,851                                     | 99.86 | 59.76 | 0.354   | 13.7  | 35.90 | 79.0  | 1400.0  |
| PFNA (C9)                         | 0.1                   | 0.5                        | 7,915                                      | 49.86 | 0.535 | 0.354   | 0.354 | 0.354 | 0.600 | 39.70   |
| PFDA (C10)                        | 0.1                   | 0.5                        | 3,274                                      | 20.63 | 0.429 | 0.354   | 0.354 | 0.354 | 0.354 | 35.80   |
| PFUnA (C11)                       | 0.1                   | 0.5                        | 972                                        | 6.12  | 0.369 | 0.354   | 0.354 | 0.354 | 0.354 | 6.00    |
| PFDoA (C12)                       | 0.1                   | 0.5                        | 103                                        | 0.65  | 0.356 | 0.354   | 0.354 | 0.354 | 0.354 | 7.40    |

PFBS, perfluorobutanesulfonic acid; PFPeA, perfluoropentanoic acid; PFHxS, perfluorohexane sulfonate; PFHxA, perfluorohexanoic acid; PFBA, perfluorobutanoic acid; PFHpA, perfluoroheptanoic acid; PFOS, perfluorooctane sulfonate; PFOA, perfluorooctanoic acid; PFNA, perfluorononanoic acid; PFDA, perfluorodecanoic acid; PFUnA, perfluoroundecanoic acid, and PFDoA, perfluorododecanoic acid.

Figure 1S

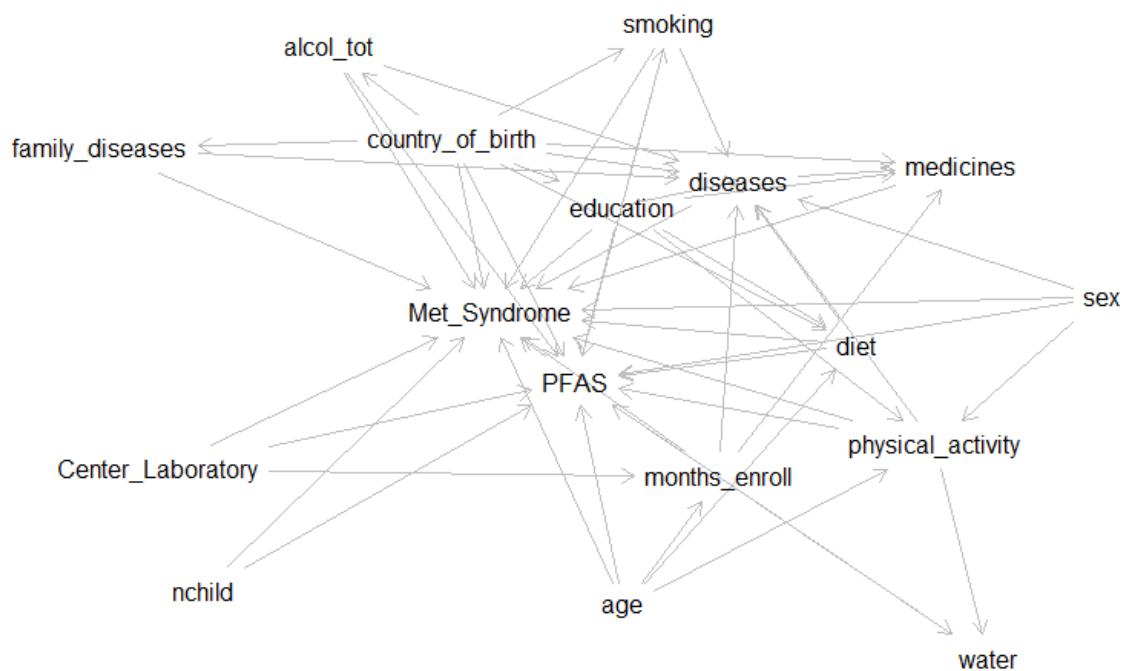

Table S2. Prevalence of metabolically healthy obesity (MHO) in the study population.

| MHO   | Overweight and obese (BMI>25) |         |       |         |         |         | obese(BMI>30) |         |       |         |         |         |
|-------|-------------------------------|---------|-------|---------|---------|---------|---------------|---------|-------|---------|---------|---------|
|       | Total                         |         | Males |         | Females |         | Total         |         | Males |         | Females |         |
|       | Freq.                         | Percent | Freq. | Percent | Freq.   | Percent | Freq.         | Percent | Freq. | Percent | Freq.   | Percent |
| NO    | 3,519                         | 67.62   | 2,293 | 73.68   | 1,226   | 58.60   | 1,080         | 78.09   | 594   | 85.10   | 486     | 70.95   |
| YES   | 1,685                         | 32.38   | 819   | 26.32   | 866     | 41.40   | 303           | 21.91   | 104   | 14.90   | 199     | 29.05   |
| Total | 5,204                         | 100     | 3,112 | 100     | 2,092   | 100     | 1,383         | 100     | 698   | 100     | 685     | 100     |

**Table 3S.** Distributions of serum PFAS concentrations (ng/mL) in the study population stratified by gender

| Gender | PFAS  | Participants who did not meet MetS criterias |       |        |        |        |        | Participants who met MetS criterias |       |       |       |        |        |
|--------|-------|----------------------------------------------|-------|--------|--------|--------|--------|-------------------------------------|-------|-------|-------|--------|--------|
|        |       | Mean                                         | min   | p25    | p50    | p75    | max    | mean                                | min   | p25   | p50   | p75    | max    |
| Total  | PFOA  | 59.37                                        | 0.354 | 13.600 | 35.600 | 78.50  | 1253.3 | 67.66                               | 0.700 | 16.80 | 41.40 | 87.80  | 1400.0 |
|        | PFOS  | 4.63                                         | 0.354 | 2.500  | 3.700  | 5.70   | 124.0  | 4.54                                | 0.354 | 2.40  | 3.70  | 5.50   | 142.0  |
|        | PFHxS | 5.89                                         | 0.354 | 1.600  | 3.500  | 7.80   | 77.1   | 7.54                                | 0.354 | 2.00  | 4.70  | 9.50   | 127.0  |
|        | PFNA  | 0.53                                         | 0.354 | 0.354  | 0.354  | 0.60   | 8.8    | 0.58                                | 0.354 | 0.35  | 0.50  | 0.60   | 39.7   |
| Male   | PFOA  | 83.92                                        | 0.354 | 25.100 | 58.500 | 115.30 | 1253.3 | 83.98                               | 0.700 | 26.50 | 55.20 | 110.30 | 1400.0 |
|        | PFOS  | 5.75                                         | 0.354 | 3.300  | 4.800  | 7.00   | 88.6   | 5.25                                | 0.600 | 2.80  | 4.20  | 6.10   | 142.0  |
|        | PFHxS | 8.82                                         | 0.354 | 3.000  | 6.500  | 12.00  | 77.1   | 9.49                                | 0.354 | 3.40  | 6.60  | 12.10  | 127.0  |
|        | PFNA  | 0.59                                         | 0.354 | 0.354  | 0.500  | 0.70   | 4.8    | 0.64                                | 0.354 | 0.35  | 0.50  | 0.70   | 39.7   |
| Female | PFOA  | 37.03                                        | 0.354 | 8.800  | 22.700 | 49.40  | 671.0  | 32.60                               | 1.000 | 8.75  | 19.80 | 43.15  | 283.7  |
|        | PFOS  | 3.60                                         | 0.354 | 2.000  | 3.000  | 4.40   | 124.0  | 3.01                                | 0.354 | 1.70  | 2.50  | 3.80   | 11.0   |
|        | PFHxS | 3.23                                         | 0.354 | 1.100  | 2.200  | 4.30   | 41.3   | 3.37                                | 0.354 | 1.20  | 2.40  | 4.45   | 17.0   |
|        | PFNA  | 0.48                                         | 0.354 | 0.354  | 0.354  | 0.50   | 8.8    | 0.45                                | 0.354 | 0.35  | 0.354 | 0.50   | 2.2    |

**Table 4S.** Number of components of the metabolic syndrome present among participants

| Number of MetS component | IDF (2005) |         | JIS definition* |         |
|--------------------------|------------|---------|-----------------|---------|
|                          | Freq.      | Percent | Freq.           | Percent |
| 0 criteria present (%)   | 10,672     | 67.22   | 8,098           | 51.01   |
| 1 criterion present (%)  | 1,702      | 10.72   | 5,348           | 33.69   |
| 2 criterion present (%)  | 2,220      | 13.98   | 1,687           | 10.63   |
| 3 criterion present (%)  | 965        | 6.08    | 563             | 3.55    |
| 4 criterion present (%)  | 305        | 1.92    | 171             | 1.08    |
| 5 criterion present (%)  | 12         | 0.08    | 9               | 0.06    |

\*Alberti (2009)
